# Supplementary material
Source: PubMed Central journal article supplement (PMC5059793)
Supplement: supp_tpc.16.00124_TPC2016-00124-BRR1_Supplemental_Data.pdf [file supp_tpc.16.00124_TPC2016-00124-BRR1_Supplemental_Data.pdf]

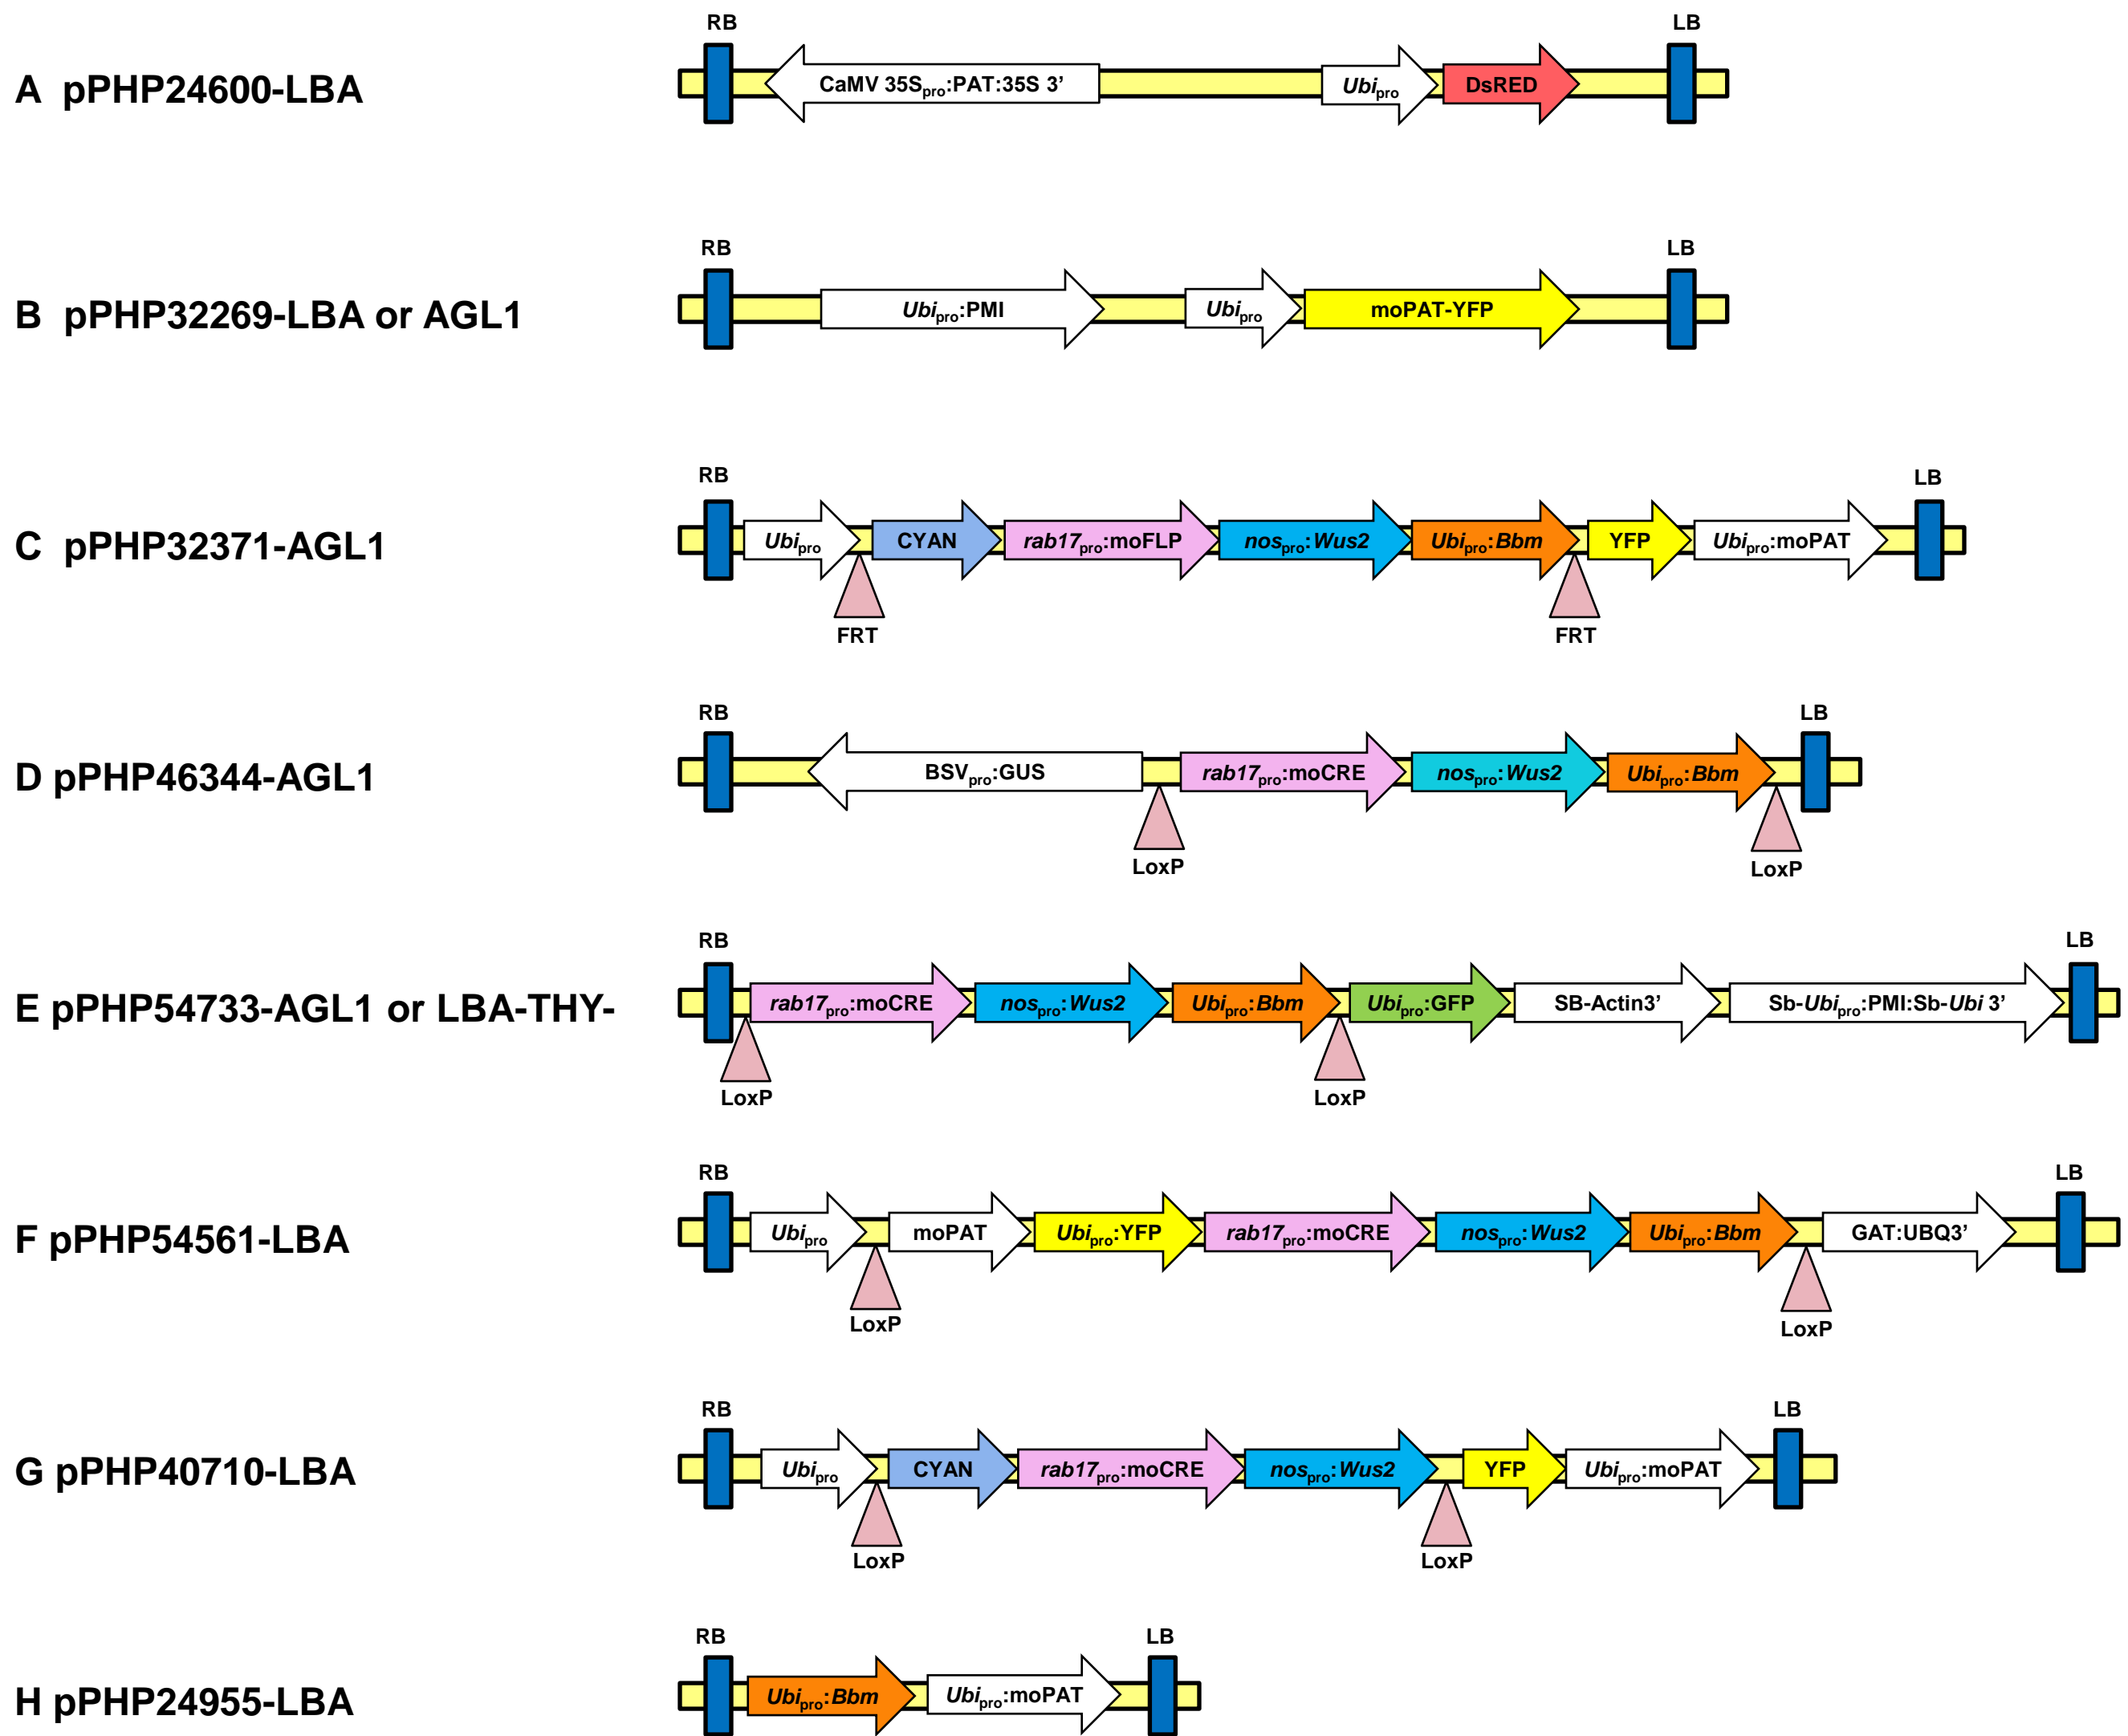

**Supplemental Figure 1. T-DNAs Used in Monocot Transformation Experiments**

(A), (B) Control T-DNA configurations containing DsRED and PAT expression cassettes (A) or moPAT-YFP and PMI (B), both without *nos<sub>pro</sub>:Wus2:pinII* or *Ubi<sub>pro</sub>:Bbm:pinII* expression cassettes.

(E to H) Variations in constructs containing both *nos<sub>pro</sub>:Wus2:pinII* and *Ubi<sub>pro</sub>:Bbm:pinII* expression cassettes used in specific experiments.

(G and H) T-DNA configurations containing either *nos<sub>pro</sub>:Wus2:pinII* alone (G) or *Ubi<sub>pro</sub>:Bbm:pinII* alone (H).

| Component Type                                | Label                       | Description                                                                                                              | References                                                              |
|-----------------------------------------------|-----------------------------|--------------------------------------------------------------------------------------------------------------------------|-------------------------------------------------------------------------|
| Promoters                                     | <i>Ubi<sub>pro</sub></i>    | The maize ubiquitin promoter, the 5' UTR and the first intron                                                            | Christensen et al., 1992                                                |
|                                               | <i>Sb-Ubi<sub>pro</sub></i> | The sorghum ubiquitin promoter, the 5' UTR and the first intron                                                          | An unpublished Pioneer sequence                                         |
|                                               | BSV <sub>pro</sub>          | Viral promoter from a banana streak virus, isolate <i>Acuminata Yunnan</i>                                               | Diehn et al., 2012                                                      |
|                                               | CaMV 35S <sub>pro</sub>     | The cauliflower mosaic virus 35S promoter                                                                                | Odell et al., 1985                                                      |
|                                               | <i>nos<sub>pro</sub></i>    | The Agrobacterium-derived nopaline synthase promoter                                                                     | An, 1986                                                                |
|                                               | <i>rab17<sub>pro</sub></i>  | The maize <i>rab17</i> promoter and 5' UTR                                                                               | Busk et al., 1997                                                       |
| 3' Sequences                                  | CaMV 35S 3'                 | The cauliflower mosaic virus 3' sequence                                                                                 | Hirt et al., 1990                                                       |
|                                               | pinII                       | The potato proteinase inhibitor II (pinII) 3' sequence                                                                   | An et al., 1989                                                         |
|                                               | <i>Sb-Ubi</i> 3'            | The Ubiquitin 3' regulatory sequence from <i>Sorghum bicolor</i>                                                         | An unpublished Pioneer sequence                                         |
|                                               | <i>Sb-Actin</i> 3'          | The Actin 3' regulatory sequence from <i>Sorghum bicolor</i>                                                             | An unpublished Pioneer sequence                                         |
|                                               | <i>UBIQ3</i> 3'             | The Arabidopsis Ubiquitin-3 3' regulatory sequence                                                                       | An unpublished Pioneer sequence                                         |
| Marker Genes                                  | PMI                         | The phosphomannose isomerase gene from <i>E. coli</i>                                                                    | Negrotto et al., 2000                                                   |
|                                               | GAT                         | A glyphosate N-acetyltransferase enzyme shuffled and optimized to confer glyphosate tolerance                            | Castle et al., 2004                                                     |
|                                               | PAT                         | The phosphinothricin acetyltransferase gene from <i>Streptomyces hygroscopicus</i>                                       | White et al., 1990                                                      |
|                                               | moPAT                       | A maize codon-optimized gene encoding phosphinothricin acetyltransferase                                                 | Jayne et al., 2000 US6096947                                            |
|                                               | moPAT-YFP                   | The maize optimized PAT gene fused to the Zs-Yellow1-N1 gene                                                             | Jayne et al., 2000 and Matz et al., 1999                                |
|                                               | GUS                         | The beta-glucuronidase gene from <i>Escherichia coli</i>                                                                 | Jefferson et al., 1997                                                  |
|                                               | moGFP                       | The maize-optimized GFP encoding the protein from <i>Aequorea victoria</i>                                               | Gordon-Kamm et al., 2002                                                |
|                                               | YFP                         | The Zs-Yellow1 N1 gene encoding a yellow fluorescent protein from <i>Zoanthus sp.</i>                                    | Matz et al., 1999.                                                      |
|                                               | CYAN                        | A gene encoding the Am-CYAN1 protein from <i>Anemonia majano</i>                                                         | Matz et al., 1999.                                                      |
|                                               | GFP                         | A gene encoding the Zs-GREEN protein from <i>Zoanthus sp.</i>                                                            | Matz et al., 1999.                                                      |
|                                               | HYG                         | The hygromycin phosphotransferase gene from <i>E. coli</i> .                                                             | Walters et al., 1992                                                    |
|                                               | YFP~HYG                     | A gene encoding a protein fusion between Zs-Yellow1 N1 and HYG                                                           | An unpublished Pioneer sequence                                         |
|                                               | DsRED                       | The DsRed gene with a potato proteinase inhibitor second intron LS1                                                      | Baird et al., 2000 and Eckes et al., 1986                               |
| Maize Developmental Gene Expression Cassettes | <i>Wus2</i>                 | The maize <i>Wuschel2</i> ( <i>Wus2</i> ) gene                                                                           | Lowe et al., 2007 US7256322                                             |
|                                               | <i>Bbm</i>                  | The maize <i>Baby boom</i> gene ( <i>Bbm</i> )                                                                           | Gordon-Kamm et al., 2005 WO2005075655                                   |
|                                               | <i>OsBbm</i>                | The <i>Baby boom</i> gene from japonica rice                                                                             | see LOC_OS01g67410 Rice Genome Annotation Project (RGAP) OSA1 Release 7 |
| Recombinase Expression Cassettes              | CRE                         | A maize-optimized CRE recombinase gene (originally from the P1 bacteriophage), with an inserted potato LS1 intron        | Odell et al., 1990                                                      |
|                                               | FLP                         | A maize-optimized FLP recombinase (originally from <i>Saccharomyces cerevisiae</i> ), with an inserted potato LS1 intron | Baszczyński et al., 1999 US5929301                                      |
| Recombinase Target Sites                      | loxP                        | The recombinase target site for the CRE recombinase from <i>E. coli</i>                                                  | Odell et al., 1990.                                                     |
|                                               | FRT                         | The recombinase target site for the FLP recombinase from yeast                                                           | Schlake and Bode, 1994                                                  |

Supplemental Table 1. List of components and abbreviations used in vector maps.

| Medium name | Use                    | Medium base | Ingredients                                                                                                                                                             |
|-------------|------------------------|-------------|-------------------------------------------------------------------------------------------------------------------------------------------------------------------------|
| 700         | Infection              | MS          | 68.5g/l sucrose, 36g/l glucose, 1.5mg/l 2,4-D, pH 5.8                                                                                                                   |
| 710I        | Co-cultivation         | MS          | 20g/l sucrose, 10g/l glucose, 2.0mg/l 2,4-D, 100um acetosyringone, 50mg/l thymidine, pH 5.8                                                                             |
| 605J        | Callus development     | MS+N6       | 20g/l sucrose, 0.6g/l glucose, 0.8mg/l 2,4-D, 1.2mg/l dicamba, 100mg/l carbenicillin                                                                                    |
| 605T        | Callus development     | MS+N6       | 20g/l sucrose, 0.6g/l glucose, 0.8mg/l 2,4-D, 1.2mg/l dicamba, 100mg/l cefotaxime, 150mg/l timentin, pH 5.8                                                             |
| 605K        | Bialaphos Selection    | MS + N6     | 605T + 3 mg/l bialaphos                                                                                                                                                 |
| 605N        | PMI Selection          | MS + N6     | 605T with adjusted sugars; 5g/l maltose, 12.5g/l mannose, pH 5.8                                                                                                        |
| 2890        | Shoot formation        | MS          | 60g/l sucrose, 0.5mg/l zeatin, 0.1mg/l thidiazuron, 1mg/l BAP, 100mg/l carbenicillin, pH 5.8                                                                            |
| 272V        | Root development       | MS          | 40g/l sucrose, hormone-free                                                                                                                                             |
| 13300       | Green tissue culture   | MS          | 0.25 g/l myo-inositol, 1 g/l casein hydrolysate, 1 mg/l thiamine, 1 mg/l 2,4-D, 30 g/l maltose, 0.69 g/l L-proline, 1.22 mg/l CuSO <sub>4</sub> , 5 g/l glucose, pH 5.8 |
| 13152T      | Green tissue selection | MS          | 13300 with no glucose, 5 g/l maltose and 12.5 g/l mannose, pH 5.8                                                                                                       |
| 13158       | Seed germination       |             | 272V with 100mg/l benomyl, pH 5.8                                                                                                                                       |

**Supplemental Table 2.** Medium formulations used for maize and rice transformation and tissue culture

| Medium Name | Use                           | Medium Base | Other Ingredients                                                                                                                                                                     |
|-------------|-------------------------------|-------------|---------------------------------------------------------------------------------------------------------------------------------------------------------------------------------------|
| DBC3 (M5G)  | Co-cultivation                | MS          | 30 g/l maltose, 5 g/l glucose, 2 mg/l thiamine, 0.25 g/l myo-inositol, 1 g/l casein hydrolysate, 0.69 g/l proline, 4.9 $\mu$ M CuSO <sub>4</sub> , 1 mg/l 2,4-D, 0.5 mg/l BAP, pH 5.8 |
| DBC3        | Phase I Callus proliferation  | MS          | 30 g/l maltose, 2 mg/l thiamine, 0.25 g/l myo-inositol, 1 g/l casein hydrolysate, 0.69 g/l proline, 4.9 $\mu$ M CuSO <sub>4</sub> , 1 mg/l 2,4-D, 0.5 mg/l BAP, pH 5.8                |
| DBC6        | Phase II Callus proliferation | MS          | 30 g/l maltose, 2 mg/l thiamine, 0.25 g/l myo-inositol, 1 g/l casein hydrolysate, 0.69 g/l proline, 4.9 $\mu$ M CuSO <sub>4</sub> , 0.5 mg/l 2,4-D, 2 mg/l BAP, pH 5.8                |
| MSA         | Maturation                    | MS          | 20 g/l sucrose, 1 g/l myo-inositol, pH 5.8                                                                                                                                            |
| MSB         | Rooting                       | MS          | 20 g/l sucrose, 1 g/l myo-inositol, 1 g/l indole-3-butyric acid, pH 5.8                                                                                                               |

**Supplemental Table 3.** Medium formulations used for sugarcane transformation and tissue culture.

## REFERENCES

- An, G. (1986). Development of plant promoter expression vectors and their use for analysis of differential activity of nopaline synthase promoter in transformed tobacco cells. *Plant Physiol.* 81:86-9.
- An, G., Mitra, A., Choi, H.K., Costa, M.A., An, K., Thornburg, R.W., and Ryan, C.A. (1989). Functional analysis of transgene expression. *Transgenic Res.* 10:183-192.
- Baird, G.S., Zacharias, D.A., and Tsien, R.Y. (2000). Biochemistry, mutagenesis, and oligomerization of DsRed, a red fluorescent protein from coral. *PNAS* 97:11984-11989.
- Baszczynski, C.L., Bowen, B.A., Drummond, B.J., Gordon-Kamm, W.J., Peterson, D.J., Sandahl, G.A., Tagliani, L.A., Zhao, Z-Y., and St Claire, G.M. (1999). Nucleic acid sequence encoding FLP recombinase. Patent No. US5929301.
- Busk, P.K., Jensen, A.B., and Pages, M. (1997). Regulatory elements in vivo in the promoter of the abscisic acid responsive gene *rab17* from maize. *Plant J.* 11(6):1285-1295.
- Castle, L.A., Siehl, D.L., Gorton, R., Patten, P.A., Chen, Y.H., Bertain, S., Cho, H.J., Duck, N., Wong, J., Liu, D., and Lassner, M.W. (2004). Discovery and directed evolution of a glyphosate tolerance gene. *Science* 304(5674):1151-4.
- Christensen, A.H., Sharrock, R.A., and Quail, P.H. (1992). Maize polyubiquitin genes: structure, thermal perturbation of expression and transcript splicing, and promoter activity following transfer to protoplasts by electroporation. *Plant Mol. Biol.* 18(4):675-689.
- Diehn, S., Lu, A.L., and Simmons, C.R. (2012). Viral promoter, truncations thereof, and methods of use. US8338662.
- Eckes, P., Rosahl, S., Schell, J., and Masterson, M. (1992). Isolation and characterization of a light-inducible, organ-specific gene from potato (*Solanum tuberosum*) and analysis of its expression after tagging and transfer into tobacco and potato shoots. *Mol. Gen. Genet.* 205(1):14-22.
- Gordon-Kamm, W., Dilkes, B.P., Lowe, K., Hoerster, G., Sun, X., Ross, M., Church, L., Bunde, C., Farrell, J., Hill, P., Maddock, S., Snyder, J., Sykes, L., Li, Z., Woo, Y-M., Bidney, D., and Larkins, B.A. (2002). Stimulation of the cell cycle and maize transformation by disruption of the plant retinoblastoma pathway. *PNAS* 99(18):11975-11980.
- Gordon-Kamm, W.J., Helentjaris, T.G., Lowe, K.S., Shen, B., Tarczynski, M.C., and Zheng, P. (2005). Ap2 Domain Transcription factor ODP2 (ovule Development Protein 2) and methods of use. Patent No. WO2005075655.
- Hirt, H., Kogl, M., Murbacher, T., and Heberle-Bors, E. (1990). Evolutionary conservation of transcriptional machinery between yeast and plants as shown by the efficient expression from the CaMV 35S promoter and 35S terminator. *Curr. Genet.* 17:473-479.
- Jayne, S., Barbour, E., and Meyer, T. (2000). Methods for improving transformation efficiency. Patent No. US6096947.
- Jefferson, R.A. (1987). Assaying chimeric genes in plants: The GUS gene fusion system. *Plant Mol. Biol. Rep.* 5, 387-405.
- Lowe, K.S., Cahoon, R.E., Scelonge, C.J., Tao, Y., Gordon-Kamm, W.J., Bruce, W.B., and Newman, L.I. (2007). Wuschel (WUS) gene homologs. Patent No. US7256322.
- Matz M.V., Fradkov, A.F., Labas, Y.A., Savitsky, A.P., Zaraisky, A.G., Markelov, M.L., and Lukyanov, S.A. (1999). Fluorescent proteins from nonbioluminescent Anthozoa species. *Nature Biotech.* 17:969-973.

Odell, J.T., Nagy, F., and Chua, N-H. (1985). The identification of DNA sequences required for activity of the cauliflower mosaic virus 35S promoter. *Nature* 313:810-812.

Odell, J., Caimi, P., Sauer, B., and Russell, S. (1990). Site-directed recombination in the genome of transgenic tobacco. *Mol. Gen. Genet.* 223:369-378.

Negrotto, D., Jolley, M., Beer, S., Wenck, A.R., and Hansen, G. (2000). The use of phosphomannose–isomerase as a selectable marker to recover transgenic maize plants (*Zea mays* L.) via *Agrobacterium* transformation. *Plant Cell Rep.* 19:798-803.

Schlake, T., and Bode, J. (1994). Use of mutated FLP recognition target (FRT) sites for the exchange of expression cassettes at defined chromosomal loci. *Biochem* 33:12746-12751.

Walters D.A., Vetsch C.S., Potts D.E., and Lundquist R.C. (1992). Transformation and inheritance of a hygromycin phosphotransferase gene in maize plants. *Plant Mol. Biol.* 18(2):189-200.

White, J., Chang, S.Y., and Bibb, M.J. (1990). A cassette containing the bar gene of *Streptomyces hygrosopicus*: a selectable marker for plant transformation. *Nucleic Acids Res.* 18:1062.
